# Supplementary material
Source: publisher figshare collection journal article supplement (https://springernature.figshare.com/ndownloader/files/15323867)
Supplement: Supplementary file 1 [file 15323867]

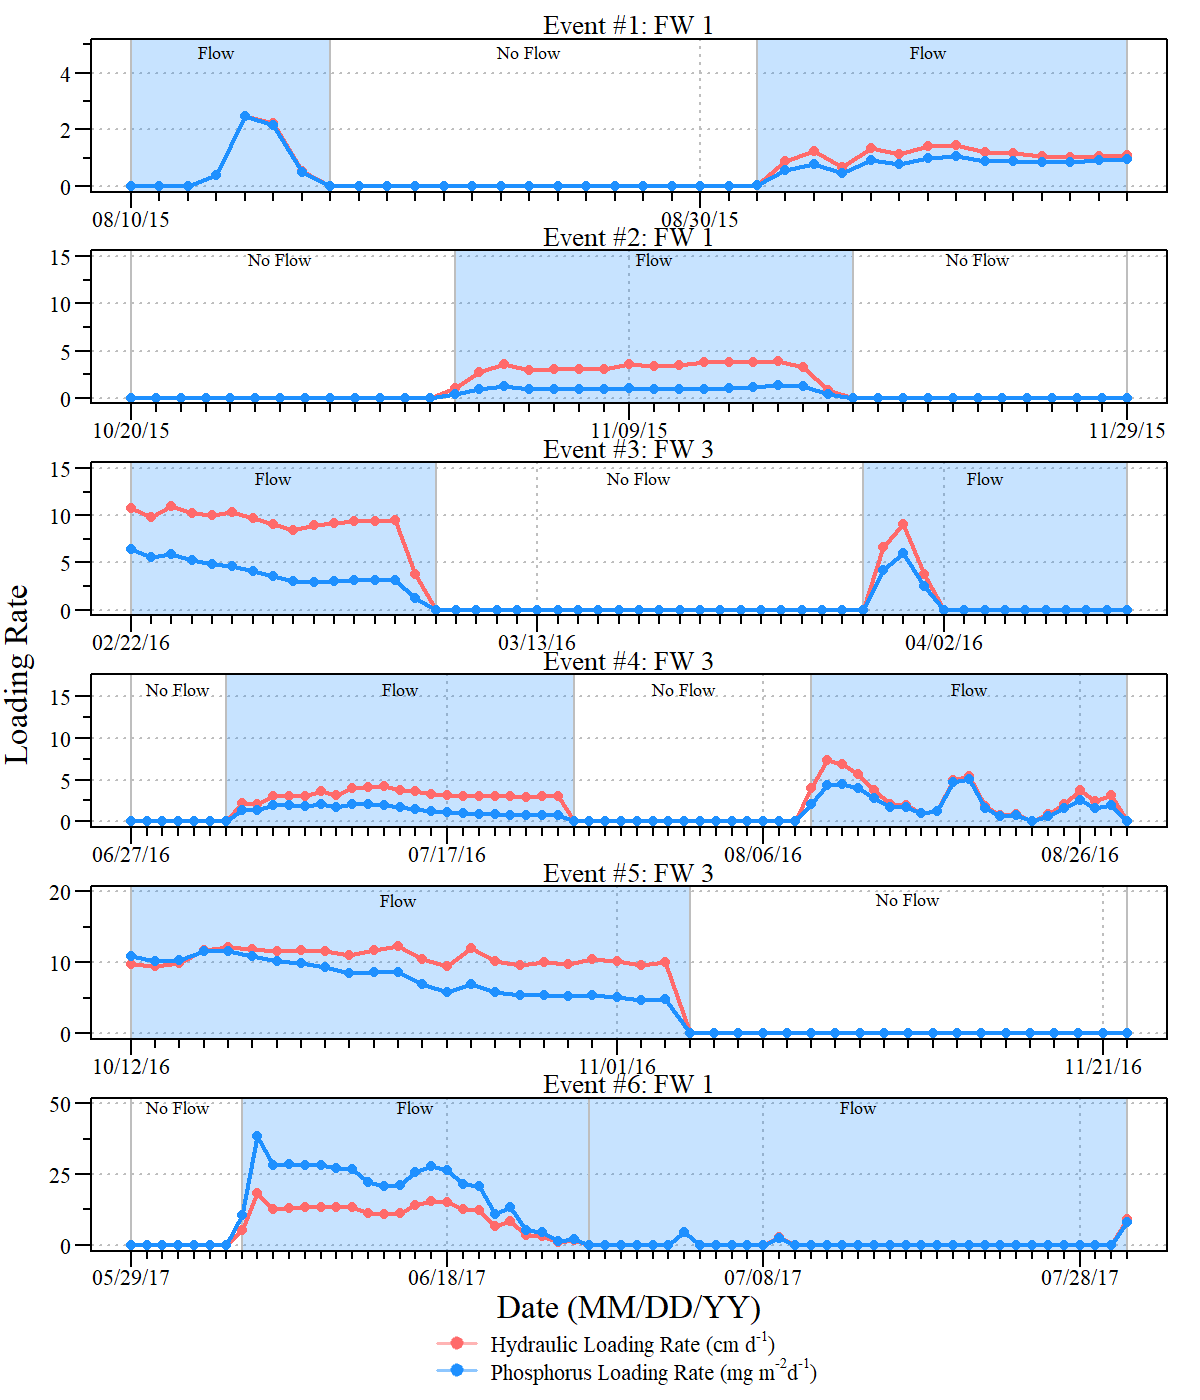


Figure S2. Hydrologic and Phosphorus loading rates (HLR and PLR, respectively) for the six flow events within flow-ways (FWs) 1 and 3 of Stormwater Treatment Area-2 between August 10th, 2015 and July 31st, 2017.
